# Supplementary material
Source: PubMed Central journal article supplement (PMC6463214)
Supplement: EMBJ-38-e100312-s001.pdf [file EMBJ-38-e100312-s001.pdf]

## Appendix

### Table of content:

Appendix Figure S1

Appendix Figure S2

Appendix Figure S3

Appendix Figure S4

Appendix Table S1

Appendix Table S2

Appendix Table S3

A

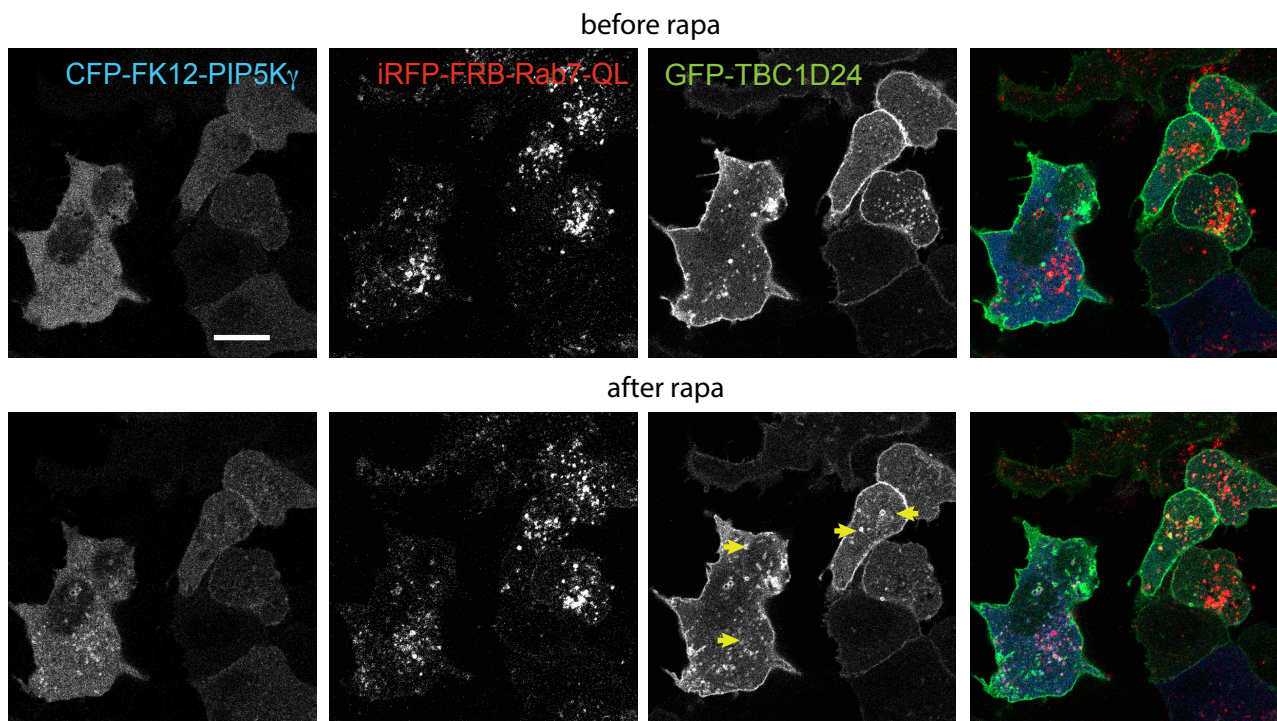

B

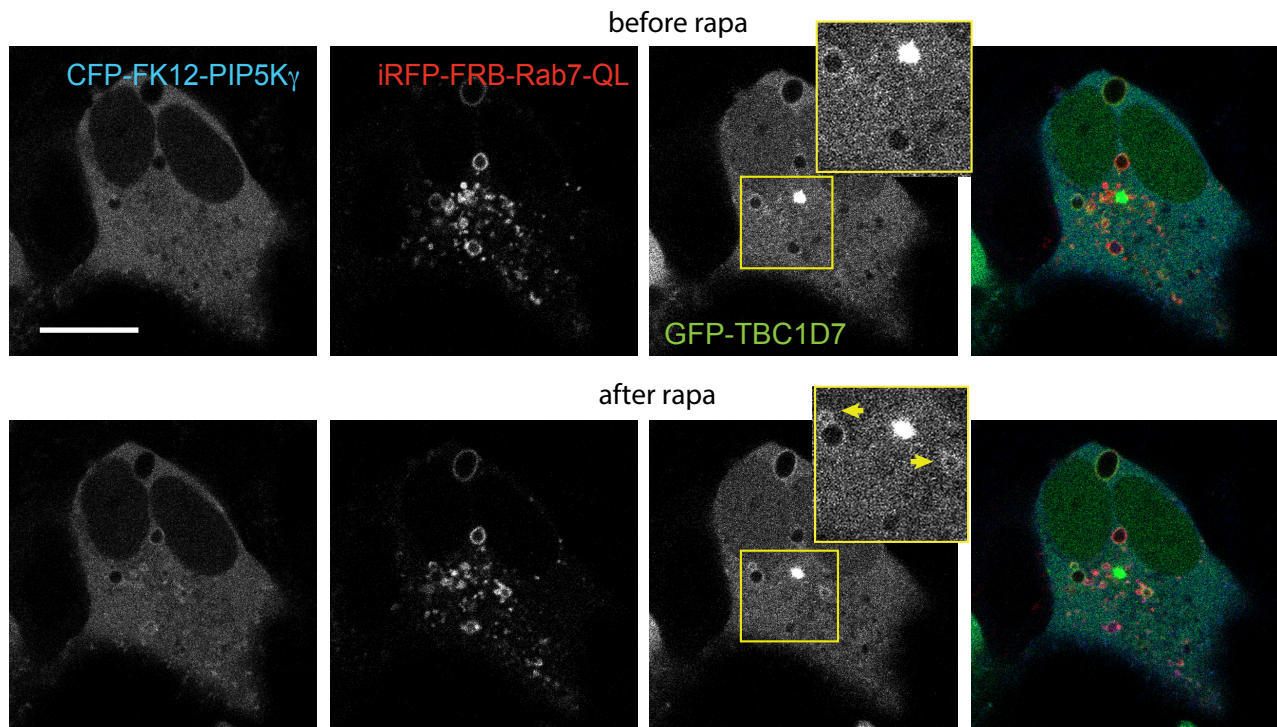

**Appendix Figure S1.** Association of TBC1D24 and TBC1D7 with Rab7 positive endosomes after PI(4,5)P<sub>2</sub> generation. (A,B) HEK293-AT1 cells were transfected with CFP-FKBP12-PIP5K $\gamma$  and iRFP-Rab7-Q67L and GFP-TBC1D24 (A) or GFP-TBC1D7 (B). TBC1D24 associates with the PI(4,5)P<sub>2</sub>-rich plasma membrane but it also gets recruited to the Rab7 endosomes when PI(4,5)P<sub>2</sub> is made in that compartment (yellow arrows). It is not clear where the TBC1D24 protein exerts its actions since the majority of the protein is not co-localized with Rab7 under control conditions. (B) PI(4,5)P<sub>2</sub> generation causes the recruitment of a small fraction of TBC1D7 (yellow arrows in the zoomed areas). Scale bar: 20  $\mu$ m.

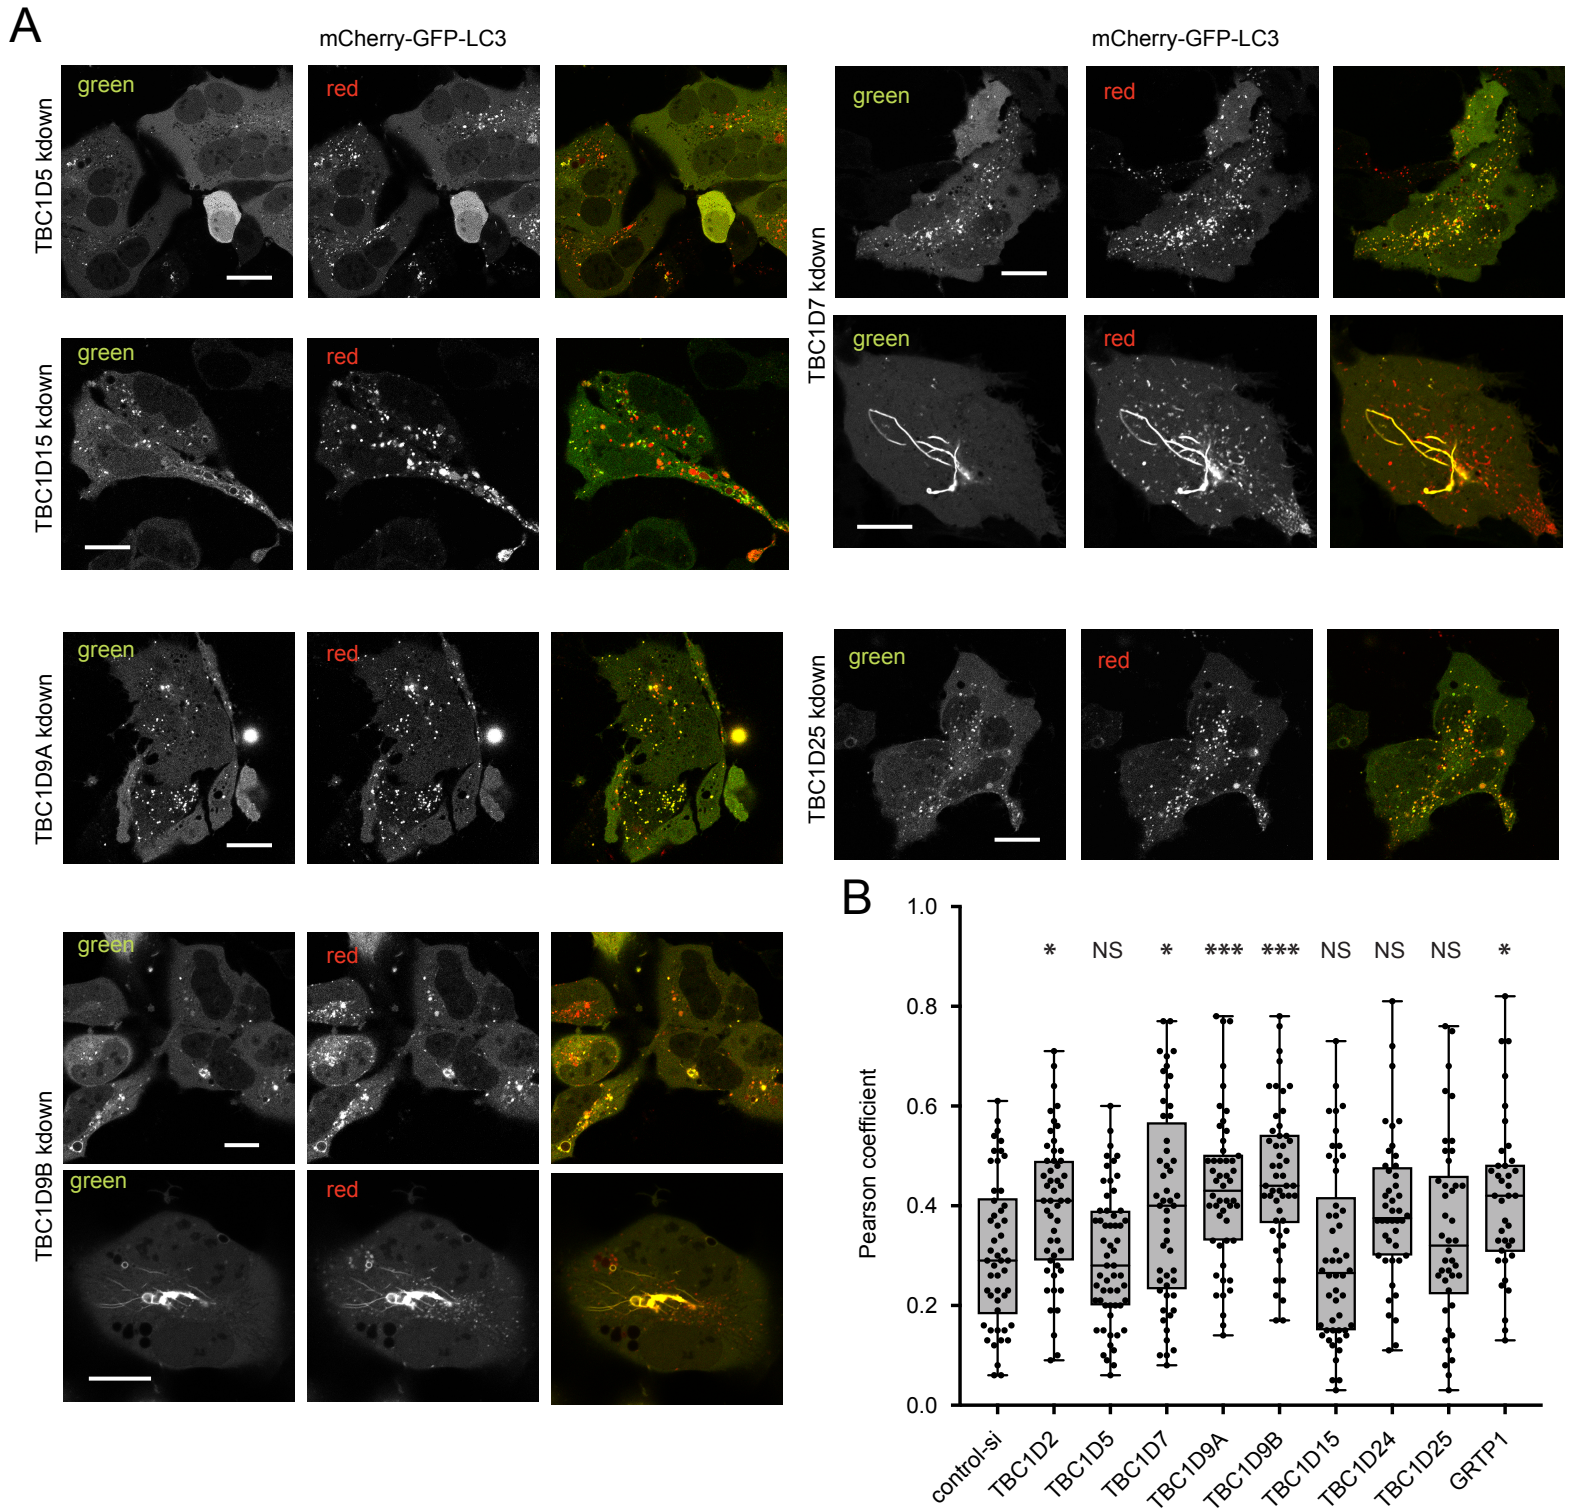

**Appendix Figure S2.** Effect of TBC1D protein knock-down on the acidification of LC3 positive structures.

(A) HEK293-AT1 cells were treated with the siRNAs targeting the indicated TBC1D proteins for three days and transfected with the mCherry-GFP-LC3 for 24 h. Cells were imaged live with confocal microscopy and saved images were analyzed off-line to calculate Pearson coefficients. Note that knock-down of several TBC1D proteins causes acidification defects and, in some cases, tubulation of the LC3-positive endosomes. Scale bars: 10  $\mu$ m.

(B) Pearson coefficients were compared using Dunnett's multiple comparisons in one-way ANOVA ( $P=0.0269$ ;  $0.9995$ ;  $0.0319$ ;  $0.0009$ ;  $P<0.0001$ ;  $0.9996$ ;  $0.0654$ ;  $0.8254$ ;  $0.0142$ ; compared to controls from  $n = 50, 51, 58, 52, 50, 50, 50, 44, 42$  and  $38$  cells for the different groups from left to right, respectively).

A

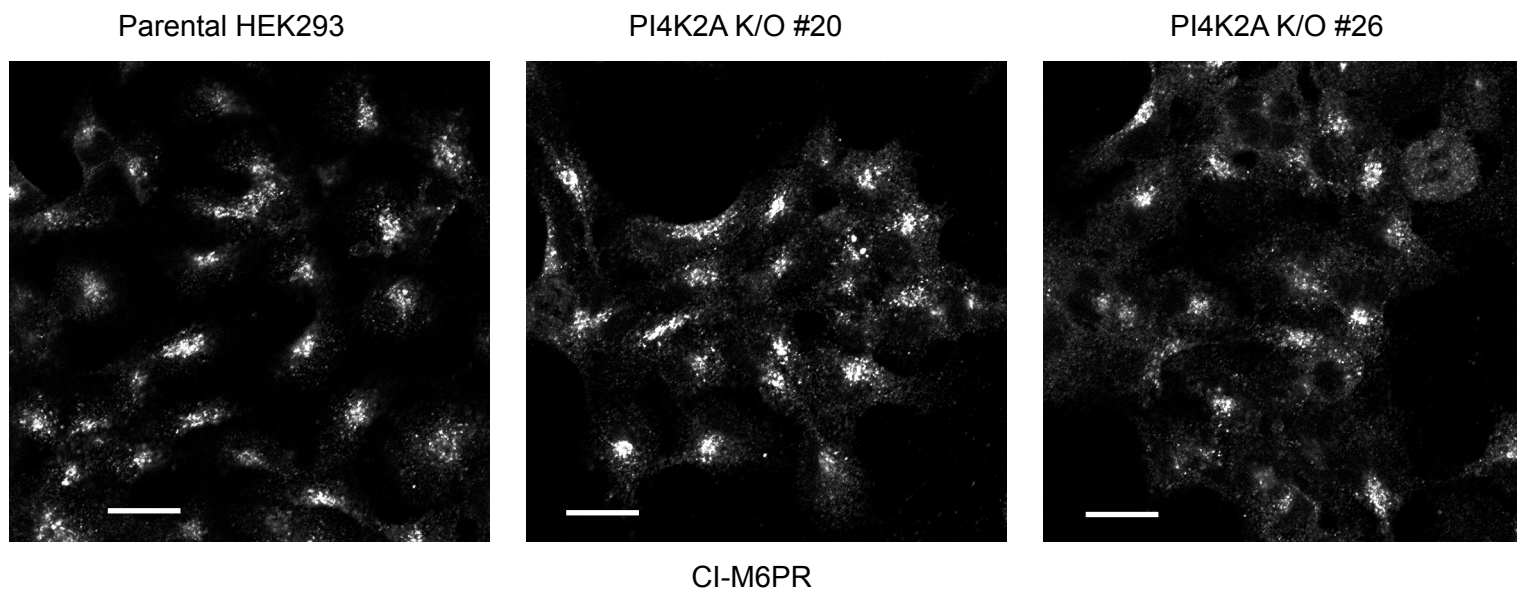

B

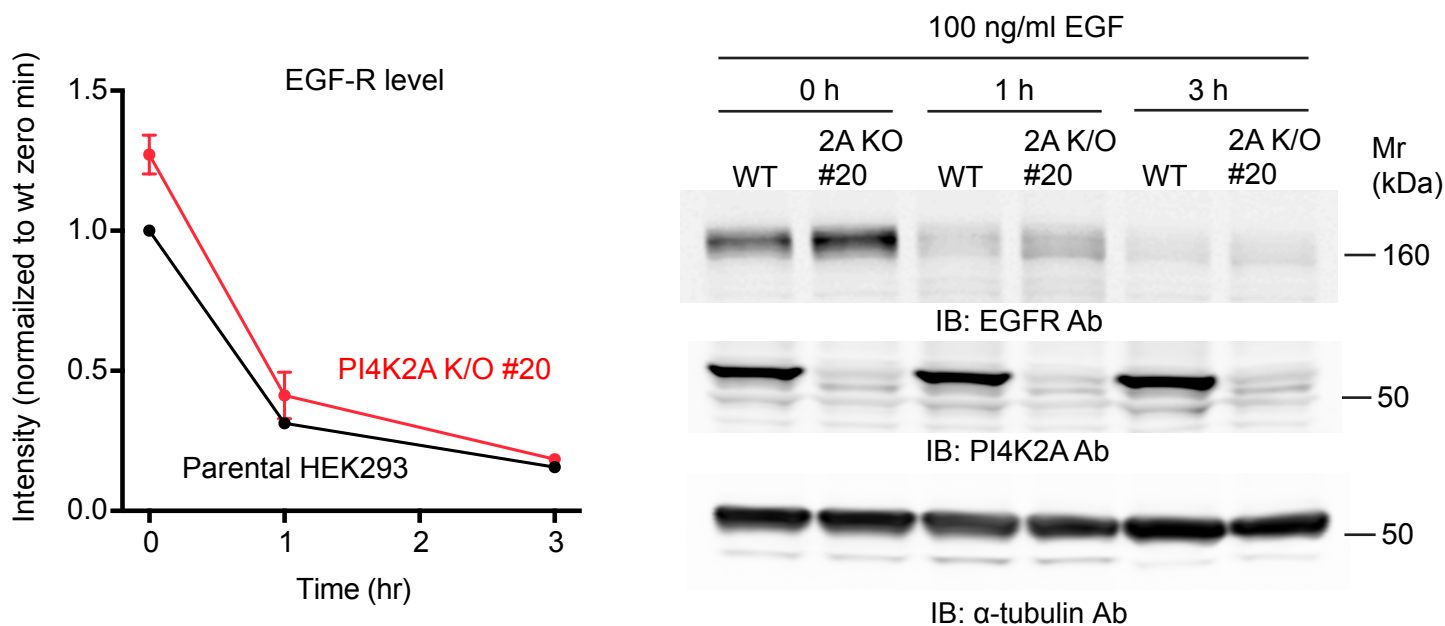

**Appendix Figure S3.** PI4K2A K/O cells didn't show obvious defects in CI-M6PR distribution and EGF-R degradation. (A) Wild-type or PI4K2A K/O cells were cultured and fixed with PFA as described in Materials and Methods. Cells were stained with anti-CI-M6PR antibody to visualize endogenous CI-M6PR. (B) EGF-R degradation assay was performed as described in Materials and Methods. Wild-type or PI4K2A K/O cells were serum-starved overnight. Cells were then treated with 100 ng/ml EGF for the indicated times. Cells were lysed and subjected to Western blot analysis using anti-EGFR, PI4K2A and  $\alpha$ -tubulin antibodies. Quantitative data are shown from three experiments (Means  $\pm$  S.E.M) on the left and a representative blotting result is shown on the right.

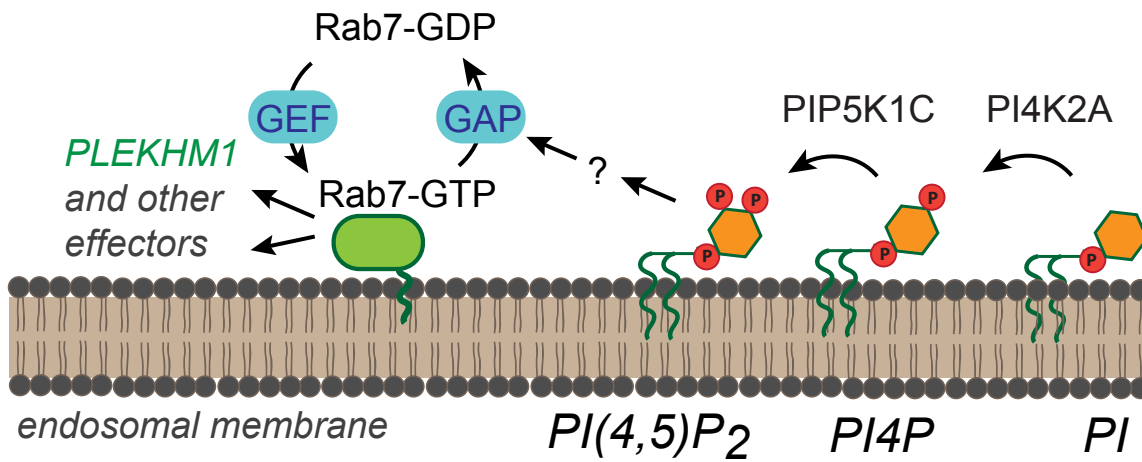

**Appendix Figure S4.** Regulation of Rab7 cycling by phosphoinositides in endosomal membranes. The majority of PI4P in Rab7 positive endosomes is generated by PI4K2A and some of this lipid serves as precursor for the PIP5K1C enzyme converting it to PI(4,5)P<sub>2</sub>. PI(4,5)P<sub>2</sub> promotes the inactivation of Rab7 presumably by activating one or more of the numerous Rab7 GAP proteins, a proposition that still needs experimental confirmation. Accelerated Rab7 cycling may affect several Rab7 effectors including PLEKHM1, an important adaptor protein promoting autophagosome-lysosome fusion.

Appendix Table S1. Source of plasmids used in this study

|                                                                           |                                                                                            |
|---------------------------------------------------------------------------|--------------------------------------------------------------------------------------------|
| CFP-FKBP-PIP5K $\alpha$ wild-type and CFP-FKBP-PIP5K $\alpha$ kinase-dead | Kind gift from Takanari Inoue (Johns Hopkins University School of Medicine, Baltimore, MD) |
| GFP-PI4K2A; HA-PI4K2A and their kinase dead versions                      | Balla et al., 2002                                                                         |
| PLCd1-PH-GFP                                                              | Varnai and Balla, 2008                                                                     |
| iRFP-FRB-Rab7                                                             | Hammond et al., 2014                                                                       |
| GFP-FYVE-EEA1, GFP-Rab4,-5,-7, -11                                        | Hunyady et al., 2002                                                                       |
| pGEX-4T-3-mR7BD                                                           | Aimee Edinger (Addgene plasmid # 79149), Romero Rosales et al., 2009                       |
| pTRE2-Bla(HA-RILP-FLAG)                                                   | Steven Weinman (Addgene plasmid # 102424) Wozniak et al., 2016                             |
| Gq-QL                                                                     | kind gift from Sue Goo Rhee (NHLBI, NIH)                                                   |
| GFP-LC3                                                                   | kind gift from Silvio Gutkind (NINDR, NIH)                                                 |
| mCherry-GFP-LC3                                                           | kind gift from Jennifer Lippincott-Schwartz (NICHD, NIH)                                   |
| mRFP-PIP5K1B                                                              | Szentpetery et al. 2010                                                                    |
| myc-PIP5K1B                                                               | Kind gift from Helen Yin, UT, Southwestern                                                 |
| plentiCRISPR v2                                                           | Kind gift from Dr. Choi Uimook (NIAAD, NIH)                                                |
| pcDNA3.1-TBC1D7                                                           | kind gift from Dr. Dr. Francis Barr (Fuchs, E. et al. (2007) JCB., 177: 1133-1143)         |
| Human PIP5K $\gamma$                                                      | gift from William Hahn & David Root (Addgene plasmid # 23848)                              |
| TBC1D2A                                                                   | GE Dharmacon, Clone ID: 9030533                                                            |
| TBC1D5                                                                    | GE Dharmacon, Clone ID: 4510019                                                            |
| TBC1D9A                                                                   | GE Dharmacon, Clone ID: ccsbBroadEn_07845                                                  |
| TBC1D9B                                                                   | GE Dharmacon, Clone ID: 6826791                                                            |
| TBC1D15                                                                   | GE Dharmacon, Clone ID: 4827246                                                            |
| TBC1D24                                                                   | GE Dharmacon, Clone ID: 40118227                                                           |

Appendix Table S2: List of siRNAs (from GE Dharmacon)

| Gene (Gene ID)  | Catalog number   |
|-----------------|------------------|
| PI4K2B (55300)  | L-006769-00-0005 |
| PIP5K1B (8395)  | L-004058-00-0005 |
| PIP5K1C (23396) | L-004782-00-0005 |
| TBC1D2A (55357) | L-020463-01-0005 |
| TBC1D5 (9779)   | L-020775-01-0005 |
| TBC1D7 (51256)  | L-021140-00-0005 |
| TBC1D9A (23158) | L-024048-00-0005 |
| TBC1D9B (23061) | L-031872-02-0005 |
| TBC1D15 (64786) | L-016209-02-0005 |
| TBC1D24 (57465) | L-022880-01-0005 |
| TBC1D25 (4943)  | L-024659-01-0005 |
| GRTP1 (79774)   | L-014422-02-0005 |

Appendix Table S3 list of primers used in this study

Mutagenesis

| Name          | Sequence                        |
|---------------|---------------------------------|
| CFP-W66A-Rv   | TGCGGTCAGGGTGGTCACGAGGGTG       |
| CFP-W66A-Fw   | GGCGTGCAGTGCTTCAGCCGCTAC        |
| Rab7 Q67L-Fw  | CTCGAGCGGTTCCAGTCCCTT           |
| Rab7 Q67L-Rv  | GCCTGCTGTGTCCCAGATCTG           |
| Rab7 N125I-Fw | ATCAAGATTGACCTCGAAAACAGACAAGTGG |
| Rab7 N125I-Rv | TCCCAACACAACGAAAGGGAAGTTTTTCAG  |

TBC proteins

| Name            | Sequence                                            |
|-----------------|-----------------------------------------------------|
| pEGFP-Arumus-Fw | AATGGAGGACACCCCGAGCGCACT                            |
| pEGFP-Arumus-Rv | TCAGCTGTGCCTTCTCCTTCGTCCTCGCT                       |
| GFP-TBC1D5-Fw   | GATGTATCATTCTTATCTGAAACTAGACATCCTCTGCAG             |
| GFP-TBC1D5-Rv   | TCAGATGTCCAGGGGACTCACAATG                           |
| TBC1D9 full Fw  | GATGTGGGTGAACCCGGAGGAGGTGTTG                        |
| TBC1D9 full Rv  | TCAGCCGGACATGGCCGAGATTTTCATAGTC                     |
| TBC1D9B full Fw | CTGGATCTTTTCTGCCCTGGGAGGCTCAAGCACTGCTACAGGAGCAGCAG  |
| TBC1D9B full Rv | ATCTGAGGCCAGAGGAGATGCTTCCGAGGAGCTATCCTCTGTGAAGTAATG |
| TBC1D9B_Fw      | GATGTGGCTCGGGCCCGA                                  |
| TBC1D9B_Rv      | TCAGCCCAAGACCCAGGG                                  |
| GFP-TBC1D15-Fw  | GATGGCGGCGGCGGGTGTGTTGT                             |
| GFP-TBC1D15-Rv  | TCATGCAGGTGTTAATCTGCAGACATCTGAGGACTG                |
| GFP-TBC1D24-Fw  | GATGGACTCTCCAGGATACTGCTTCGTGGAC                     |
| GFP-TBC1D24-Rv  | TCACTGGGTGTCAGGGTCCTGGAAGC                          |



Others

| Name                           | Sequence                                  |
|--------------------------------|-------------------------------------------|
| mRFP-Sluc-PLCd1PH-Sall-Fw      | ATATGTCGACAGTGAGGGCAGAGGAAGTCTTCTAACATGC  |
| mRFP-Sluc-PLCd1PH-PvuI-Rev     | ATATCGATCGTTCTCGAGATCTCTGCTCGTTCTTCAGC    |
| PLCd1-PvuI-Fw                  | ATATCGATCGGACTCGGGCCGGGACTTCC             |
| PLCd1-Sall-Rv                  | ATATGTCGACATCCTTCAGGAAGTTCTGCAGCTCC       |
| mRFP-Sluc-PLCd1PH-Sall-Fw      | TCGACAGTGAGGGCAGAGGAAGTCTTCTAACATGC       |
| mRFP-Sluc-PLCd1PH-PvuI-Rev2    | GATCGTTCTCGAGATCTCTGCTCGTTCTTCAGC         |
| PLEKHM1 for BRET sensor Fw     | GATGCTTTCAGTGGTGGAGAATGGACT               |
| PLEKHM1 for BRET sensor Rv     | CGGCGAAAATGTTCTGTTCCTGGTACTTG             |
| PLEKHM1 RH for BRET sensor Fw2 | GATGCTGAGTGACAGCCACGG                     |
| EEA1FYVE-Fw for blunt end      | GGTGAAGAAGGAGTGGCAATCT                    |
| EEA1FYVE-Rv for blunt end      | CTCCTTGCAAGTCATTGAAACATGCATC              |
| VPS35-Fw                       | GATGCCTACAACACAGCAGTCCCCTCAGGATG          |
| VPS35-Rv                       | CTAAAGGATGAGACCTTCATAAATTGGCCCCTCGGATTCTG |
| VPS35-Rv for BRET              | CAAGGATGAGACCTTCATAAATTGGCCCCTCGGATTCTG   |
| RILP-FL-Fw                     | GATGGAGCCCAGGAGGGCGGCGC                   |
| RILP-FL-Rv                     | CTAGGCCTCTGGGGCGGCTGAGGCC                 |
| RILP-FL-Rv for BRET            | CGGCCTCTGGGGCGGCTGAGGCC                   |
| PIP5K1B-Fw                     | GATGTCTTCTGCTGCTGAAAATGGAGAG              |
| PIP5K1B-Rv                     | TAATGCTCTGATGTTGCCATCTTGAACCTG            |
