# Supplementary material
Source: PubMed Central journal article supplement (PMC6463214)

Figure 2B

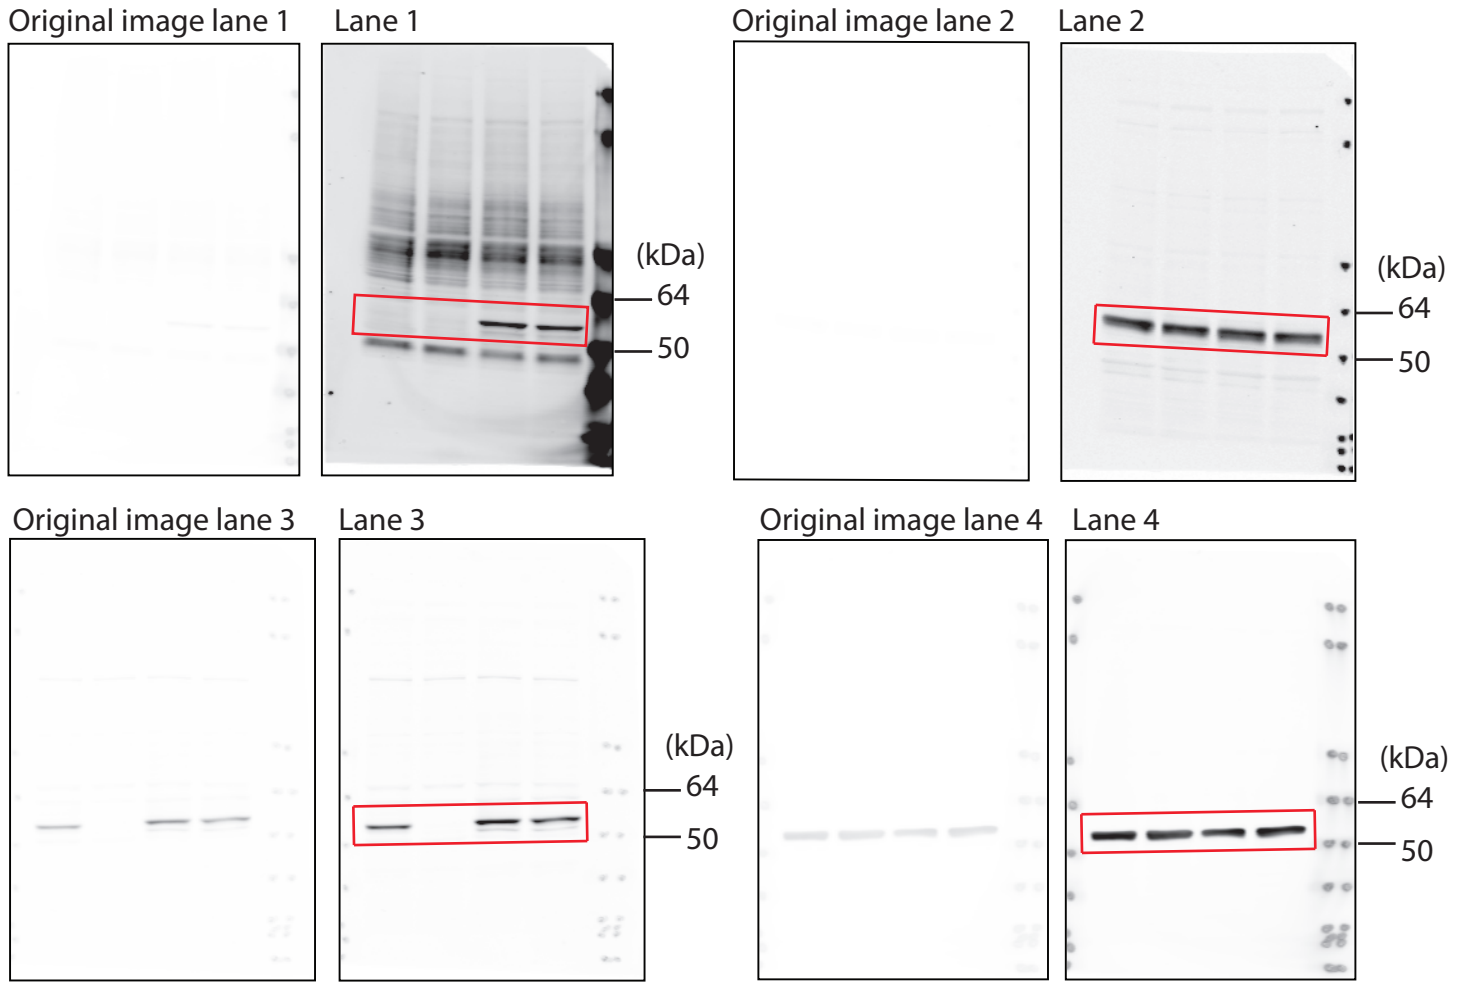

Figure 5C

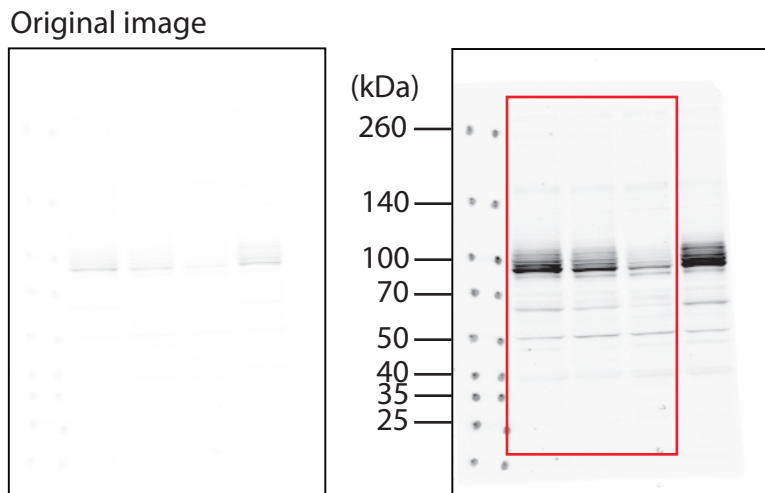

Supplement: EMBJ-38-e100312-s003.pdf [file EMBJ-38-e100312-s003.pdf]
